# Supplementary material for: High molecular weight DNA extraction strategies for long‐read sequencing of complex metagenomes
Source: PubMed Central journal article supplement — Mol Ecol Resour. 2022 Feb 7;22(5):1786–802. doi: 10.1111/1755-0998.13588 (PMC9177515; doi:10.1111/1755-0998.13588), 2022-02-07

Supplementary Figure for the manuscript entitled

**High molecular weight DNA extraction strategies for long-read sequencing of complex metagenomes**

Florian Trigodet<sup>1,‡</sup>, Karen Lolans<sup>1,‡</sup>, Emily Fogarty<sup>2</sup>, Alon Shaiber<sup>3</sup>, Hilary G. Morrison<sup>4</sup>, Luis Barreiro<sup>1</sup>, Bana Jabri<sup>1</sup>, A. Murat Eren<sup>1,2,3,4\*</sup>

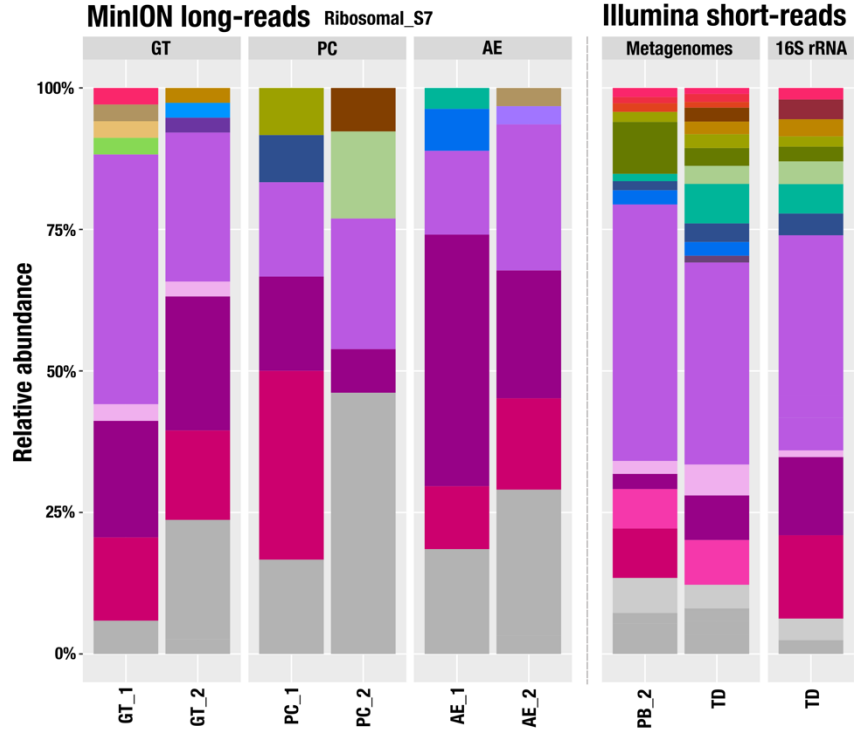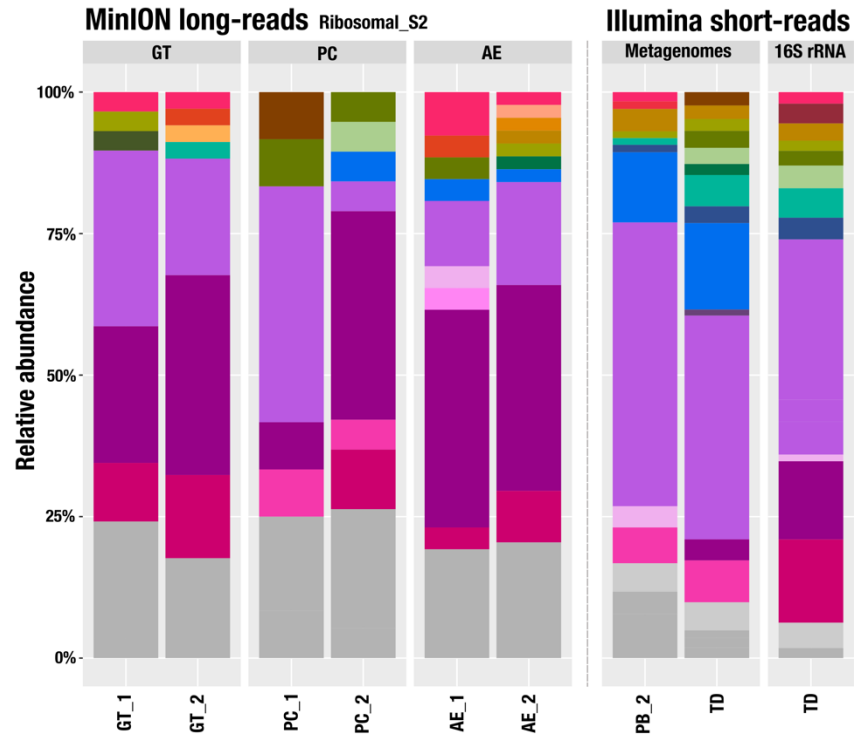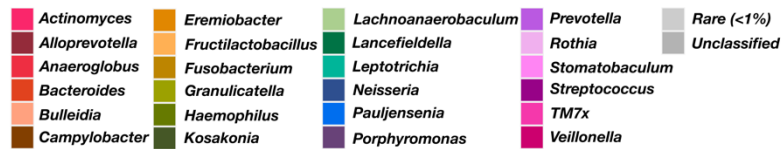

Supplement: NIHMS1774134-supplement-fS1.pdf [file NIHMS1774134-supplement-fS1.pdf]
